# Supplementary material
Source: MDPI journal article supplement (https://www.mdpi.com/2313-0105/8/9/115)
Supplement: s1 [file s1 › batteries-1835754-supplementary.pdf]

# Constructing robust solid electrolyte interface *via* ZrO<sub>2</sub> coating layer for hard carbon anode in sodium-ion batteries

Yuteng Gong<sup>1</sup>, Chengxin Yu<sup>1</sup>, Yu Li<sup>1,\*</sup>, Ji Qian<sup>1</sup>, Chuan Wu<sup>1,2</sup>, Ying Bai<sup>1,\*</sup>

<sup>1</sup> School of Materials Science and Engineering, Beijing Institute of Technology, Beijing 100081, PR China

<sup>2</sup> Yangtze Delta Region Academy of Beijing Institute of Technology, Jiaxing 314019, PR China

## Supplementary information

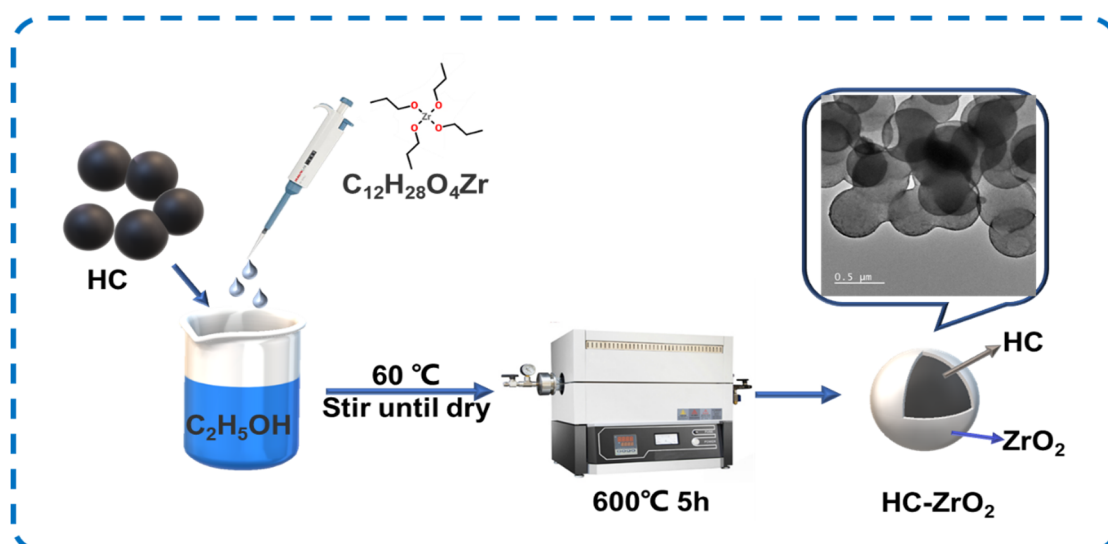

Supplementary Figure S1. Schematic diagram of experimental process.

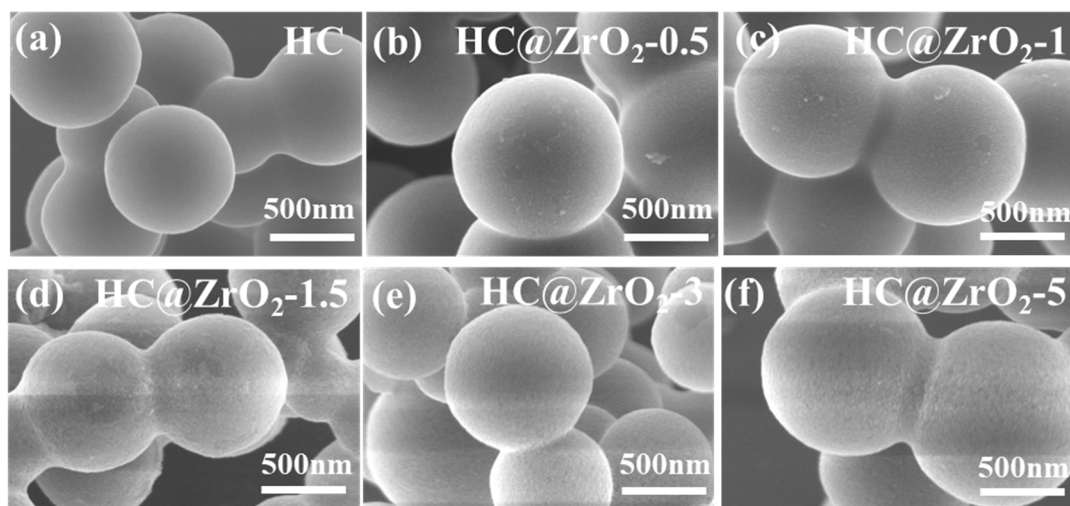

Supplementary Figure S2. SEM images of HC and HC@ZrO<sub>2</sub>.

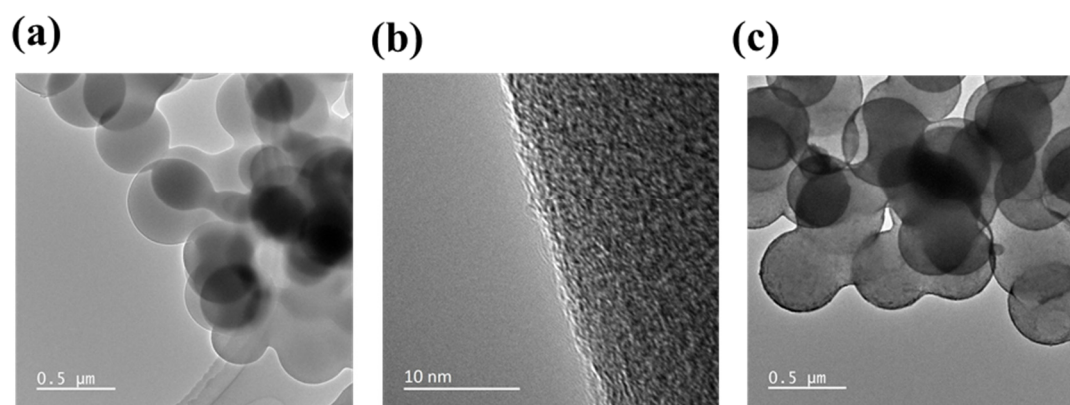

Supplementary Figure S3. TEM images of HC (a, b) and HC@ZrO<sub>2</sub>-1 (c).

Supplementary Table S1. The layer spacing and corresponding crystal information of ZrO<sub>2</sub> (PDF #49-1642)

| 2-Theta | d (Å)  | (h k l) |
|---------|--------|---------|
| 30.1    | 2.9646 | (1 1 1) |
| 34.9    | 2.5645 | (2 0 0) |
| 50.2    | 1.8152 | (2 2 0) |
| 59.7    | 1.5467 | (3 1 1) |
| 62.7    | 1.481  | (2 2 2) |
| 73.9    | 1.2809 | (4 0 0) |

Supplementary Table S2. BET results of HC and HC@ZrO<sub>2</sub>-1

| Samples                | S <sub>BET</sub> (m <sup>2</sup> g <sup>-1</sup> ) | Pore volume<br>(cm <sup>3</sup> g <sup>-1</sup> ) | Pore size<br>(nm) |
|------------------------|----------------------------------------------------|---------------------------------------------------|-------------------|
| HC                     | 17.84                                              | 0.014365                                          | 1.4745            |
| HC@ZrO <sub>2</sub> -1 | 22.35                                              | 0.021644                                          | 3.873             |

Supplementary Table S3. The electrochemical properties of HC and HC@ZrO<sub>2</sub>

| Samples                  | Charge specific capacity (mAh·g <sup>-1</sup> ) | Discharge specific capacity (mAh·g <sup>-1</sup> ) | ICE (%) |
|--------------------------|-------------------------------------------------|----------------------------------------------------|---------|
| HC                       | 305.8                                           | 475.1                                              | 64.4    |
| HC@ZrO <sub>2</sub> -0.5 | 305.3                                           | 395.2                                              | 77.3    |
| HC@ZrO <sub>2</sub> -1   | 313.2                                           | 395.3                                              | 79.2    |
| HC@ZrO <sub>2</sub> -1.5 | 304.4                                           | 404.6                                              | 75.2    |
| HC@ZrO <sub>2</sub> -3   | 239.5                                           | 329.1                                              | 72.8    |
| HC@ZrO <sub>2</sub> -5   | 227.5                                           | 317                                                | 71.8    |

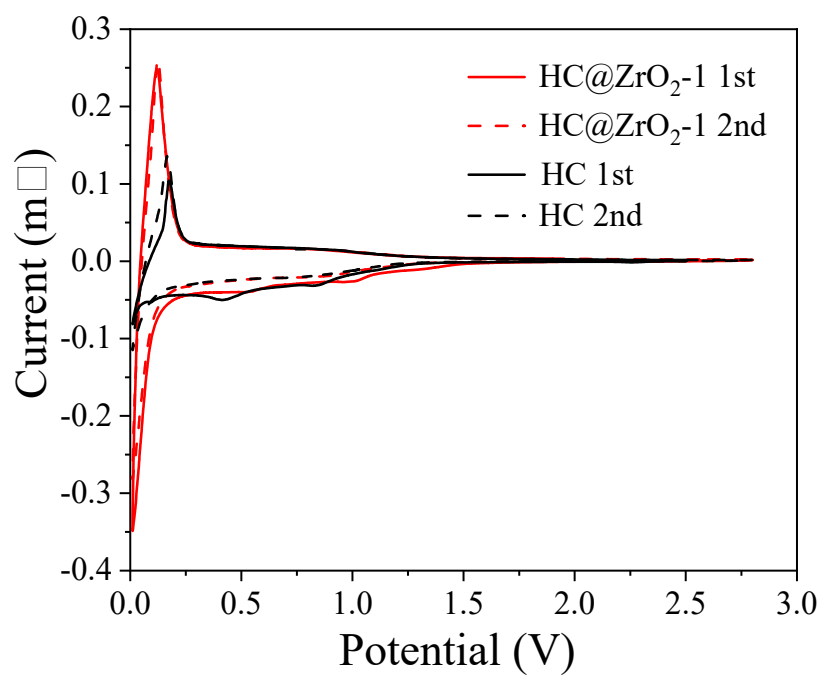

Supplementary Figure S4. The CV curves for the first two cycles for HC and HC@ZrO<sub>2</sub>-1.

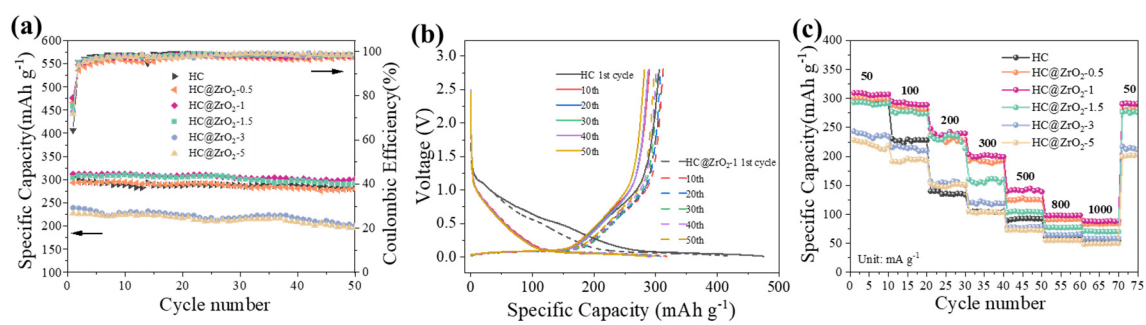

Supplementary Figure S5. (a) Cycling performance of the HC and HC@ZrO<sub>2</sub> electrodes at 50 m<sup>2</sup> g<sup>-1</sup>. (b) Charge-discharge profiles of the HC and HC@ZrO<sub>2</sub>-1 electrodes at different cycles. (c) Rate performance of the HC and HC@ZrO<sub>2</sub> electrodes.

Supplementary Table S4. ICE literature comparison of improving HC anode of SIBs by surface engineering.

| Materials                  | Preparation method                          | Electrolyte                    | Current density       | ICE untreated | ICE after modification | Ref.      |
|----------------------------|---------------------------------------------|--------------------------------|-----------------------|---------------|------------------------|-----------|
| HC- $\text{TiO}_2$         | $\text{TiO}_2$ coating in aqueous phase     | 1 M $\text{NaPF}_6$ in EC/DEC  | 50 $\text{mA g}^{-1}$ | 64.7%         | 81.1%                  | [1]       |
| HC-DEB $\text{TiO}_2$      | DEB $\text{TiO}_2$ coating in aqueous phase | 1 M $\text{NaPF}_6$ in EC/DEC  | 50 $\text{mA g}^{-1}$ | 65.2%         | 77.2%                  | [2]       |
| $\text{TiO}_2$ -coated HC  | Atomic layer deposition                     | 1 M $\text{NaClO}_4$ in EC/DEC | 20 $\text{mA g}^{-1}$ | 67%           | 75%                    | [3]       |
| Hydrophilic HC             | Oxygen plasma treatment                     | 1 M $\text{NaClO}_4$ in EC/PC  | 50 $\text{mA g}^{-1}$ | 51.4%         | 65.9%                  | [4]       |
| Monodispersed HC spherules | Soft carbon coating by pyrolysis of toluene | 1 M $\text{NaClO}_4$ in EC/DEC | 30 $\text{mA g}^{-1}$ | 53%           | 83%                    | [5]       |
| HC@ $\text{ZrO}_2$         | $\text{ZrO}_2$ coating in aqueous phase     | 1 M $\text{NaPF}_6$ in EC/DEC  | 50 $\text{mA g}^{-1}$ | 64.4%         | 79.2%                  | This work |

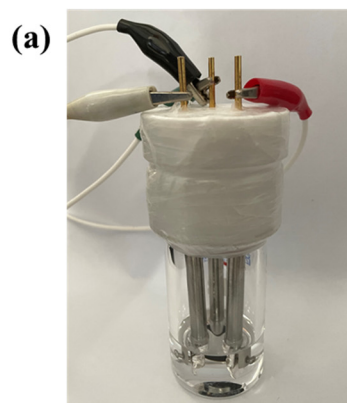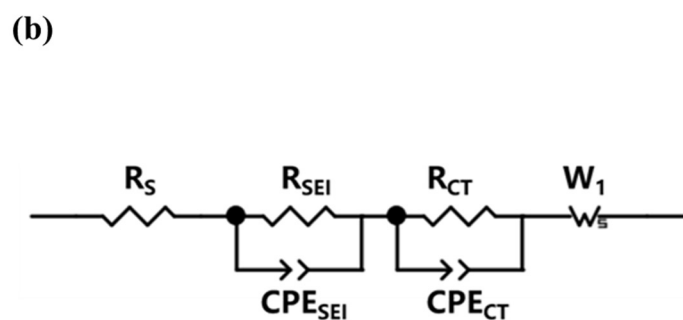

Supplementary Figure S6. (a) Digital photo of three-electrode system. (b) The equivalent circuit of EIS curve.

Supplementary Table S5. The fitted results of the EIS plots using the equivalent circuit in Figure S5b.

| Samples                | $R_s (\Omega)$ | $R_{SEI} (\Omega)$ | $R_{CT} (\Omega)$ |
|------------------------|----------------|--------------------|-------------------|
| HC                     | 2.324          | 113.3              | 61.7              |
| HC@ZrO <sub>2</sub> -1 | 3.303          | 79.2               | 58.2              |

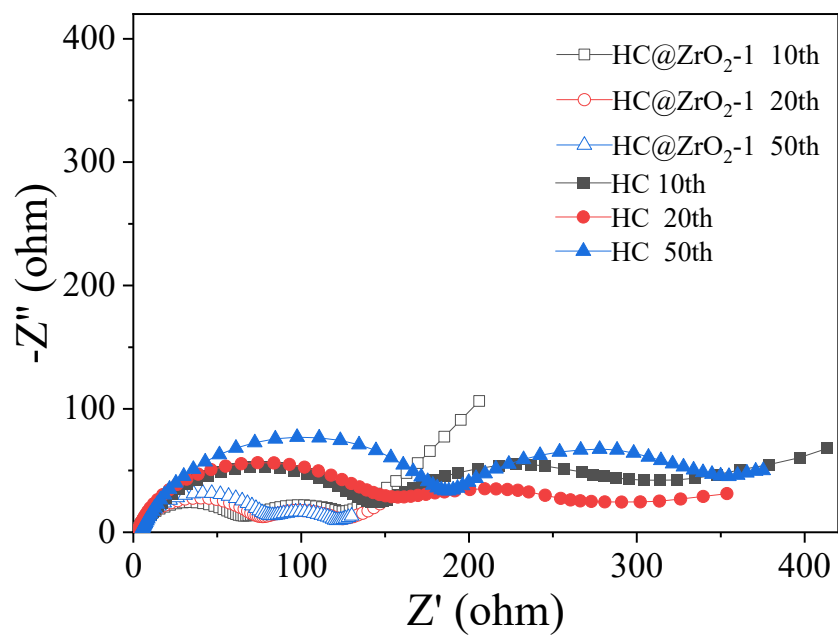

Supplementary Figure S7. EIS plots of HC and HC@ZrO<sub>2</sub>-1 electrodes after different cycles.

## Reference

- [1] Yu, C.; Li, Y.; Ren, H.; Qian, J.; Wang, S.; Feng, X.; Liu, M.; Bai, Y.; Wu, C. Engineering homotype heterojunctions in hard carbon to induce stable solid electrolyte interfaces for sodium-ion batteries. *Carbon Energy*, **2022**, DOI: 10.1002/cey2.220.
- [2] Yu, C.; Li, Y.; Wang, Z.; Wang, X.; Bai, Y.; Wu, C. Surface engineering based on in situ electro-polymerization to boost the initial Coulombic efficiency of hard carbon anode for sodium-ion battery. *Rare Met.* **2022**, *41*, 1616-1625.
- [3] Lu, H.; Chen, X.; Jia, Y.; Chen, H.; Wang, Y.; Qi, X.; Cao, Y. Engineering  $\text{Al}_2\text{O}_3$  atomic layer deposition: Enhanced hard carbon-electrolyte interface towards practical sodium ion batteries. *Nano Energy* **2019**, *64*, 103903.
- [4] Xie, H.; Wu, Z.; Wang, Z.; Qin, N.; Li, Y.; Cao, Y.; Lu, Z. Solid electrolyte interface stabilization via surface oxygen species functionalization in hard carbon for superior performance sodium-ion batteries. *J. Mater. Chem. A* **2020**, *8*, 3606-3612.
- [5] Li, Y.; Xu, S.; Wu, X.; Yu, J.; Wang, Y.; Hu, Y.; Huang, X. Amorphous monodispersed hard carbon micro-spherules derived from biomass as a high performance negative electrode material for sodium-ion batteries. *J. Mater. Chem. A* **2015**, *3*, 71-77.
